# Supplementary material for: Molecular Phylogenetic Relationships Based on Mitogenomes of Spider: Insights Into Evolution and Adaptation to Extreme Environments
Source: PubMed Central journal article supplement (PMC11707259; doi:10.1002/ece3.70774), 2025-01-07

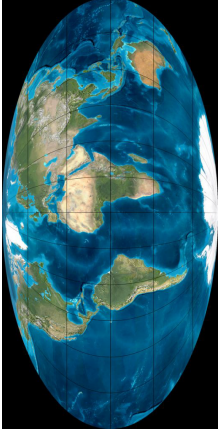

now

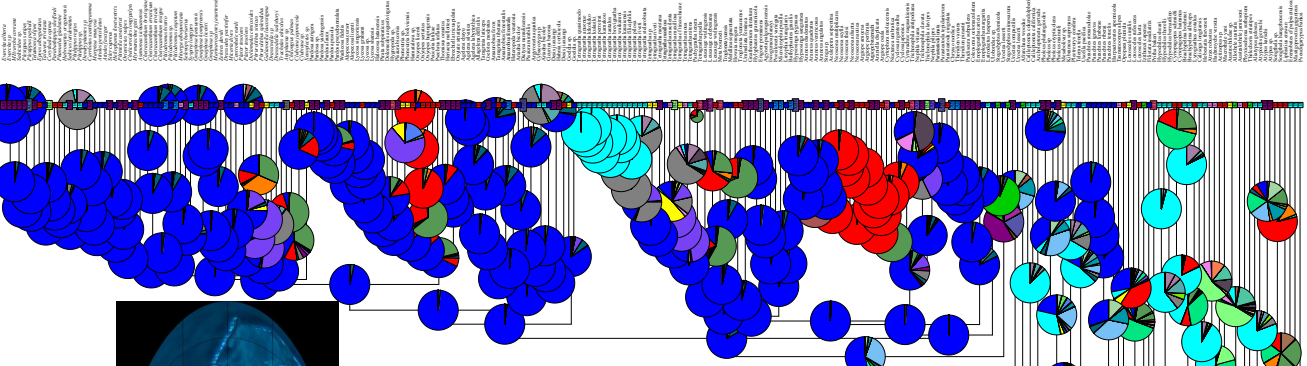

- Regions
- A: Palaearctic realm
  - B: Nearctic realm
  - C: Ethiopian realm
  - D: Neotropical realm
  - E: Oriental realm
  - F: Australian realm

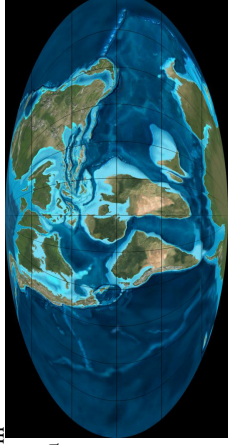

90 Mya

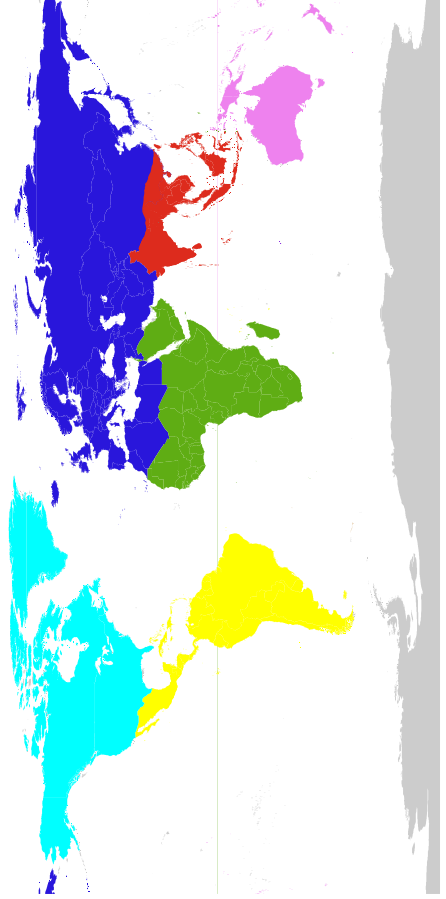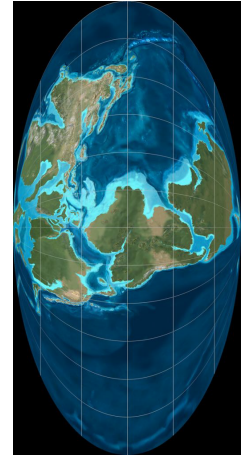

150 Mya

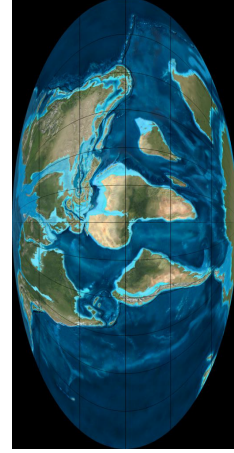

65 Mya

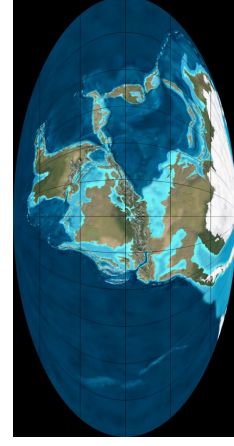

400 Mya

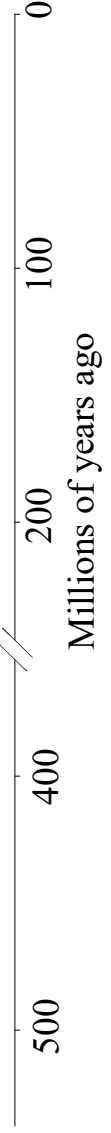

Supplement: ECE3-15-e70774-s009.pdf [file ECE3-15-e70774-s009.pdf]
