# Supplementary material for: Molecular Phylogenetic Relationships Based on Mitogenomes of Spider: Insights Into Evolution and Adaptation to Extreme Environments
Source: PubMed Central journal article supplement (PMC11707259; doi:10.1002/ece3.70774), 2025-01-07

(a)

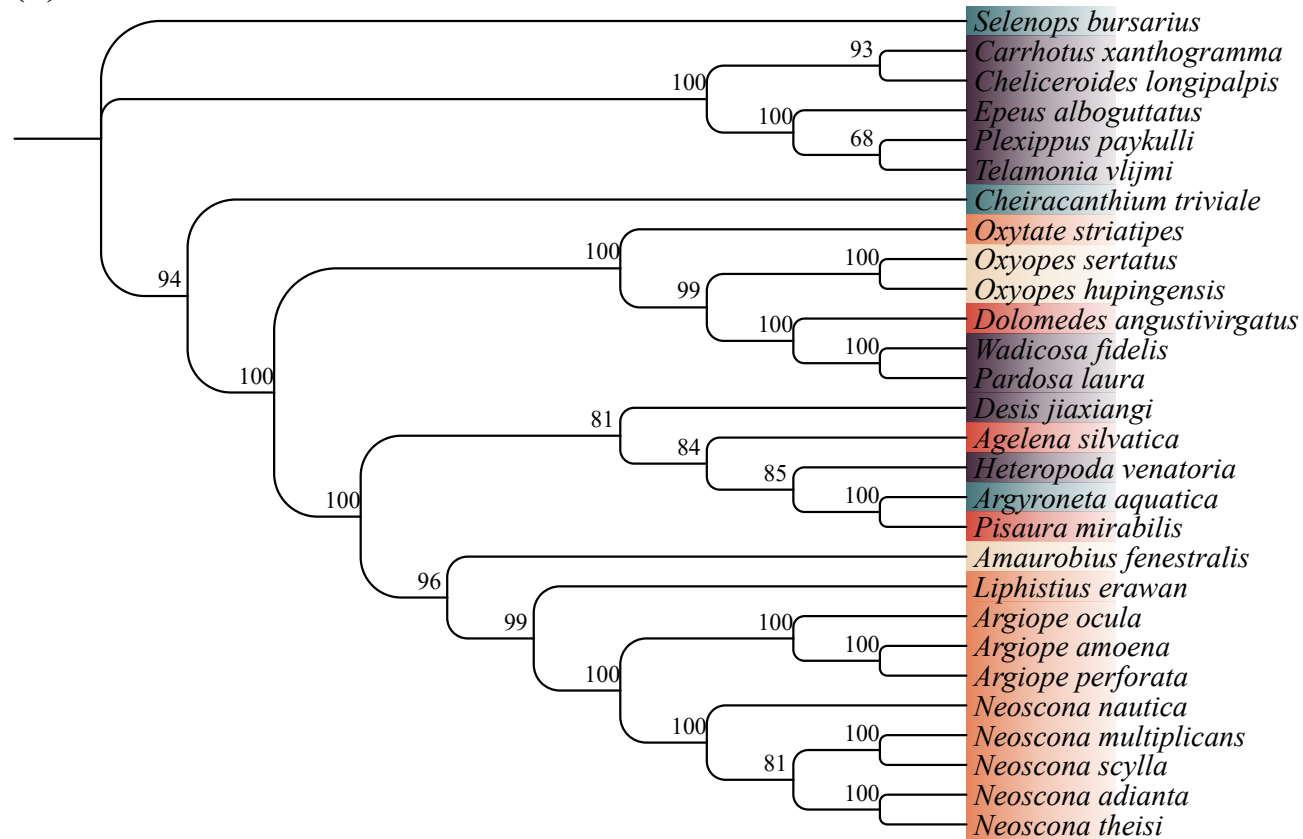

(b)

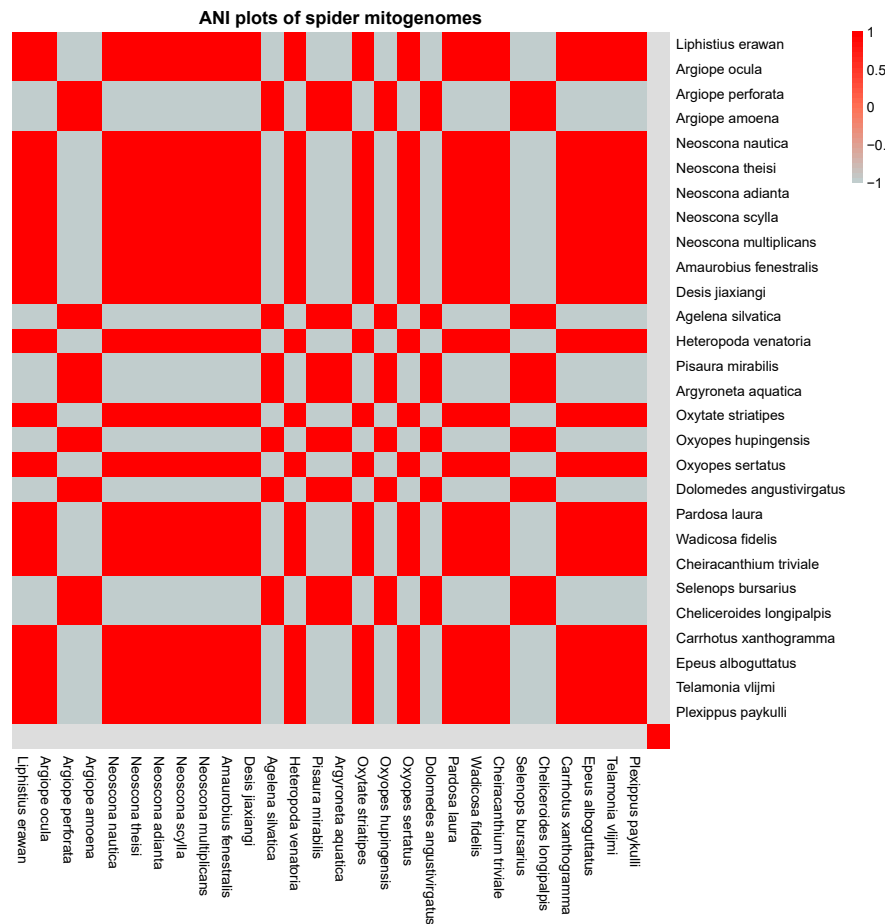

Supplement: ECE3-15-e70774-s016.pdf [file ECE3-15-e70774-s016.pdf]
