# Supplementary material for: Molecular Phylogenetic Relationships Based on Mitogenomes of Spider: Insights Into Evolution and Adaptation to Extreme Environments
Source: PubMed Central journal article supplement (PMC11707259; doi:10.1002/ece3.70774), 2025-01-07
Supplement: ECE3-15-e70774-s022.pdf [file ECE3-15-e70774-s022.pdf]

Traits

- A: Curtain-web/Tunnel-web
- C : irregular web
- E: loose spacewebs
- G: Orb-web
- I: Scatter-web
- K: silk-lined tubular retreats
- M: trapdoor
- O: silken retreat
- B: funnel-web
- D: lampshade web
- F: mesh-like web
- H: purseweb
- J: sheet-web
- L: star-shaped sheetweb
- N: free living
- P: Cave dwellers

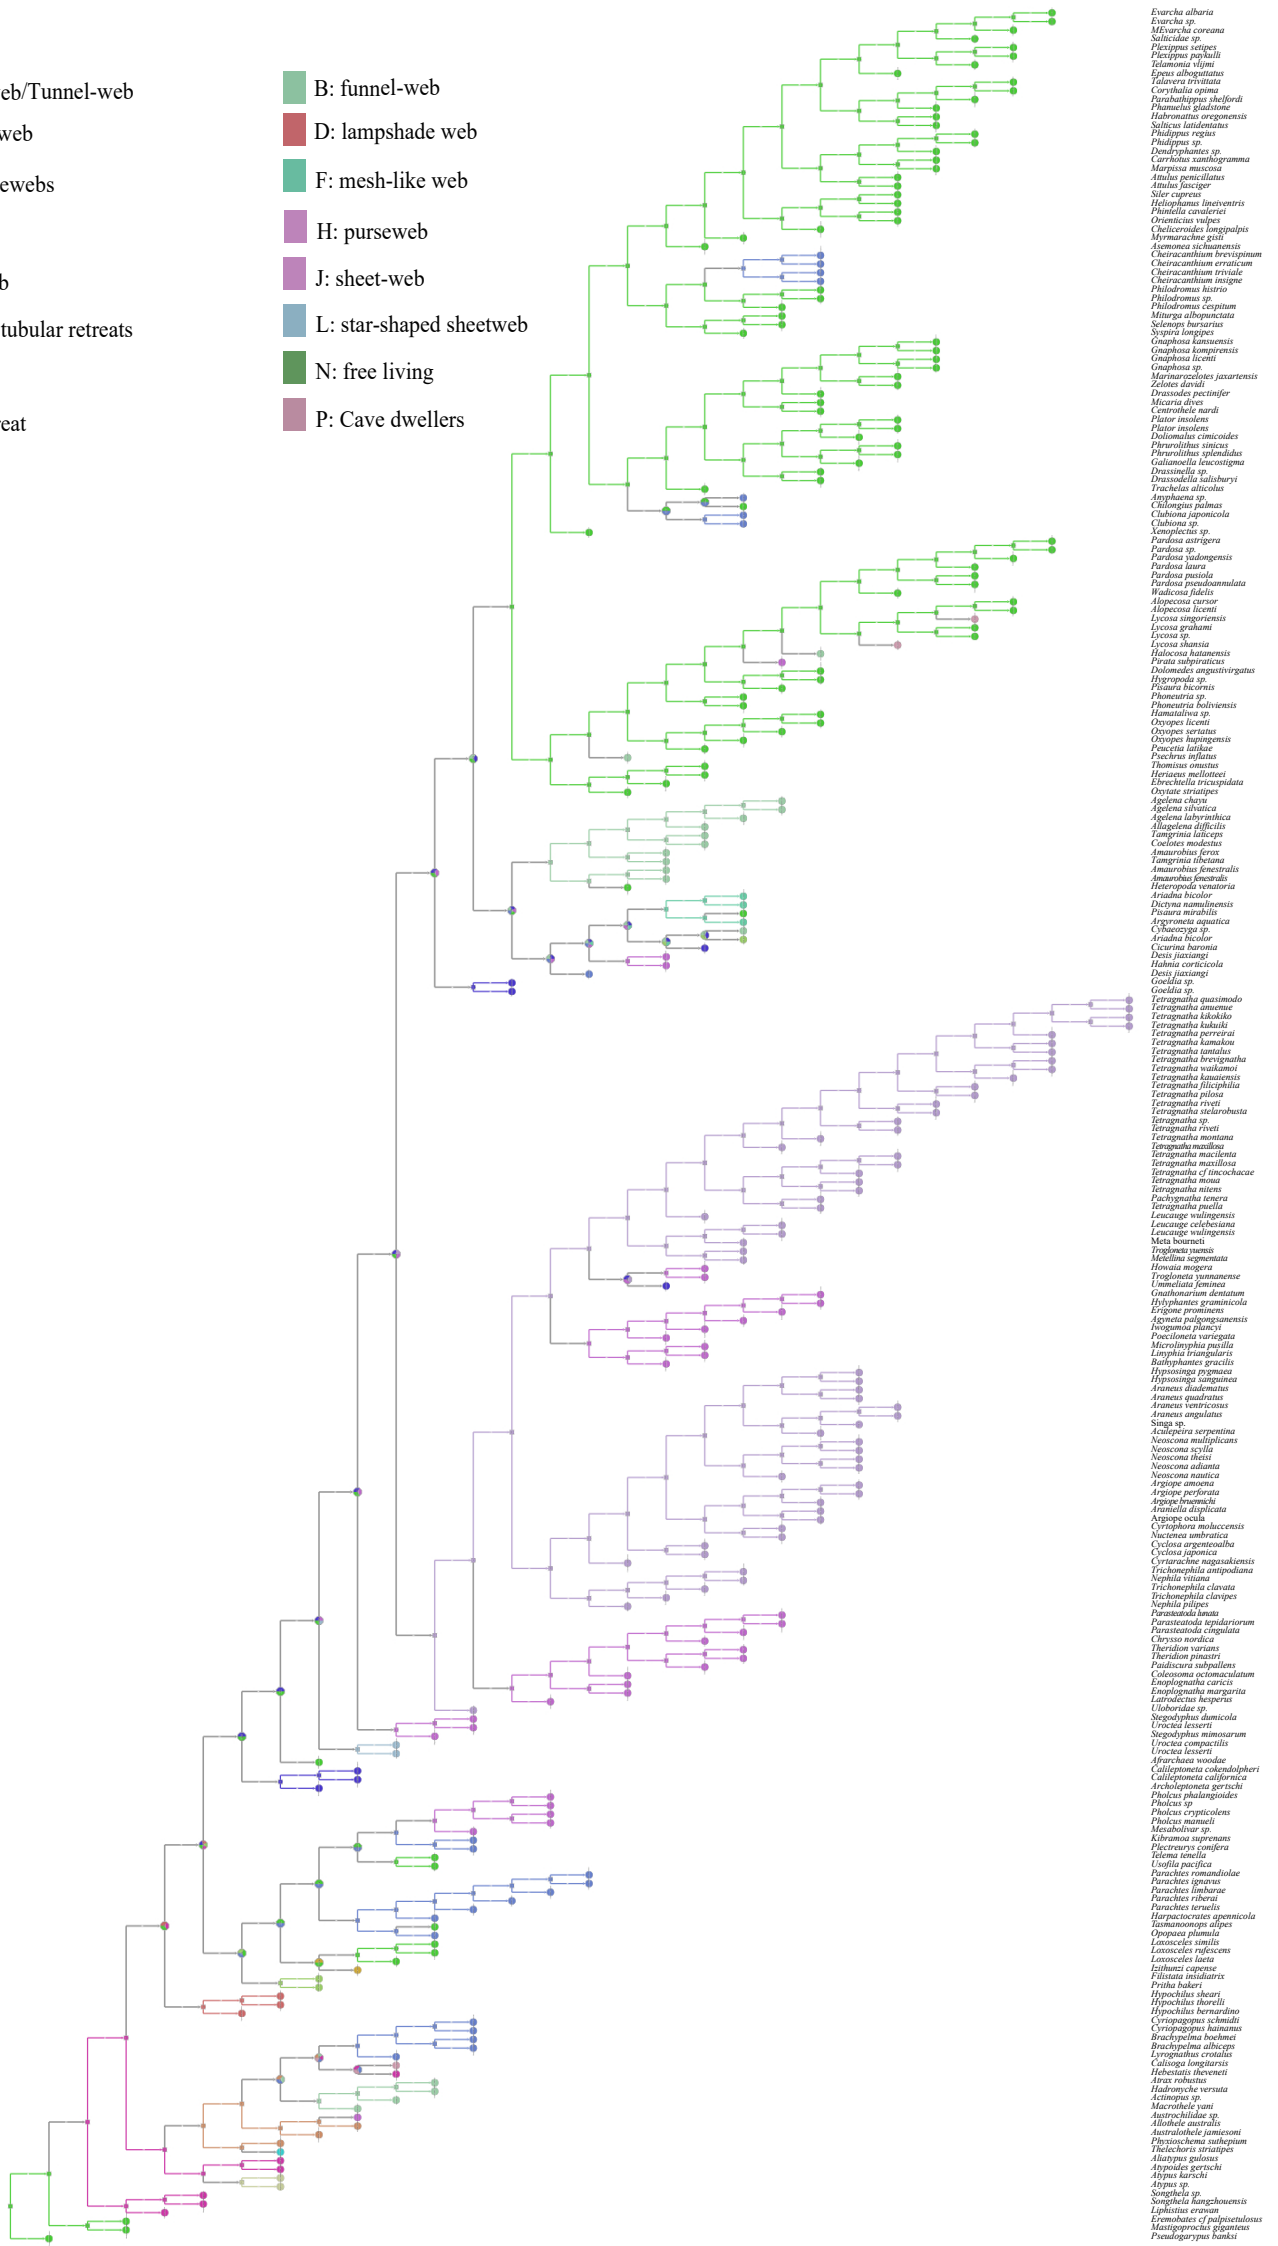

- Evarcha albaria*
- Evarcha sp.*
- Miarcha coreana*
- Salticidae sp.*
- Plexippus setipes*
- Plexippus papillalis*
- Eloneta vlamii*
- Episus alboguttatus*
- Lametta irritans*
- Corythalia optima*
- Parabuthippus sheltoni*
- Phanacis gladiosa*
- Halobonates oregonensis*
- Salticus landinatus*
- Phidippus regius*
- Phidippus sp.*
- Dondryphantes sp.*
- Carriacus xanthogonatus*
- Margusia muscosa*
- Attilus penicillatus*
- Attilus fusciger*
- Nier capensis*
- Helophanus lineiventris*
- Phidippus cavaleriei*
- Araneus vulpae*
- Chelicaceroides longipalpis*
- Araneus gisti*
- Araneus sichuanensis*
- Cheracanthium brevispinum*
- Cheracanthium erraticum*
- Cheracanthium triviale*
- Cheracanthium insigne*
- Phidippus hirtus*
- Phidippus sp.*
- Theridion capense*
- Miturga albopunctata*
- Seleoneta burrarius*
- Syrrhaptes longipes*
- Gnaphosa kansuensis*
- Gnaphosa longispina*
- Gnaphosa licenti*
- Gnaphosa sp.*
- Marinarocelos jaxartensis*
- Zelotes darwini*
- Drassodes pectinifer*
- Micrura vici*
- Centrolene nardi*
- Putor insolens*
- Putor insolens*
- Dolomedes cimicoides*
- Dolomedes sinicus*
- Pirarottulus splendidus*
- Galinaella lanceolatus*
- Drassinella sp.*
- Drassodella satubaryi*
- Trachelas alticolus*
- Aryphaea sp.*
- Chilungusa palmas*
- Chilungusa japonicola*
- Chilungusa sp.*
- Xenoplectus sp.*
- Pardosa astrigera*
- Pardosa sp.*
- Pardosa viduogenensis*
- Pardosa laura*
- Pardosa meola*
- Pardosa pseudomaculata*
- Walckena fidalis*
- Altopocosa cursor*
- Altopocosa licenti*
- Lycosa singoriensis*
- Lycosa grabhami*
- Lycosa sp.*
- Lycosa shansuensis*
- Halocosa huananensis*
- Pirata subpiraticus*
- Dolomedes angustivirgatus*
- Hygroplitis sp.*
- Phonetrus bicolor*
- Phonetrus sp.*
- Phonetrus baivianensis*
- Hamataliwa sp.*
- Oxyopes licenti*
- Oxyopes seratus*
- Oxyopes hupingensis*
- Psecus latiae*
- Psecus inflatus*
- Thomisus ornatus*
- Heriatus melilotaei*
- Etrechella tricuspidata*
- Oxytate striatipes*
- Aeglema shawi*
- Aeglema silvatica*
- Aeglema lubriventrica*
- Allogelena difficilis*
- Lamproloma laticeps*
- Coclema modestum*
- Amarobius ferax*
- Amarobius tibetanus*
- Amarobius fenestratus*
- Amarobius fenestratus*
- Heteropoda venatoria*
- Heteropoda bicolor*
- Dicyna numalimensis*
- Pirata vici*
- Argoneta aquatica*
- Cybaeops sp.*
- Ariadna bicolor*
- Lycarina baronia*
- Deisi jitungensis*
- Hahnia corticicola*
- Deisi jitungensis*
- Goeldia sp.*
- Tetragnatha quasimodo*
- Tetragnatha kikokiko*
- Tetragnatha kikokiko*
- Tetragnatha perreirai*
- Tetragnatha kamakou*
- Tetragnatha taitiana*
- Tetragnatha brevispinata*
- Tetragnatha wukamou*
- Tetragnatha kuanensis*
- Tetragnatha filicollis*
- Tetragnatha pilosa*
- Tetragnatha sp.*
- Tetragnatha stelarobusta*
- Tetragnatha sp.*
- Tetragnatha riveti*
- Tetragnatha monimana*
- Tetragnatha maillou*
- Tetragnatha maculenta*
- Tetragnatha maxillosa*
- Tetragnatha cf. tincochacae*
- Tetragnatha moua*
- Tetragnatha niensis*
- Tetragnatha tenax*
- Tetragnatha puella*
- Leucage voluportensis*
- Leucage celebesiana*
- Leucage voluportensis*
- Meta boarnetti*
- Argoneta jumi*
- Megaloneta segmentata*
- Hovatta moereri*
- Trogloctonus yamamotoi*
- Ummeliata feminea*
- Gauchaoneta dentatum*
- Hypophantes graminicola*
- Erigone promensis*
- Argoneta pulgongensis*
- Evogoneta pulgongensis*
- Pocilloneta variegata*
- Micrilymbus pusilla*
- Linyphia triangularis*
- Balophantes gracilis*
- Hypsoneta pygmaea*
- Hypsoneta sanguinea*
- Araneus diadematus*
- Araneus quadratus*
- Araneus ventricosus*
- Araneus angulatus*
- Sings sp.*
- Aculepeira serpentina*
- Neocona multiplicans*
- Neocona scylla*
- Neocona mellea*
- Neocona adianta*
- Neocona nautica*
- Argiope amoena*
- Argiope perforata*
- Argiope moereri*
- Araniella displicata*
- Araniella scylla*
- Cyrtophora moluccensis*
- Neocyttarus umbellatus*
- Cyclotus argenteoalba*
- Cyclotus japonica*
- Cyrtarachne nagasakiensis*
- Trichonephila antipodiana*
- Nephila vitiosa*
- Trichonephila clavata*
- Trichonephila clavipes*
- Nephila pilipes*
- Parastatoida longipalpis*
- Parastatoida apudiarum*
- Parastatoida cingulata*
- Cryseis nordica*
- Theridion varians*
- Theridion pinasteri*
- Phidippus subspilans*
- Colopsoma octomaculatum*
- Eriopogonella caricis*
- Eriopogonella margarita*
- Lutroidea hesperis*
- Uloboridae sp.*
- Stegodyphus dimicula*
- Urocyba tesserti*
- Stegodyphus mimosarum*
- Urocyba compactus*
- Urocyba tesserti*
- Afranciscus woodi*
- Colleponeta cokendalpheni*
- Colleponeta californica*
- Archileptoneta gertschi*
- Pholcus sp.*
- Pholcus crypsicollis*
- Pholcus monardi*
- Mesabolivar sp.*
- Arcturus superans*
- Plectreurys conferta*
- Urocyba tesserti*
- Urocyba pacifica*
- Parachites romanulioi*
- Parachites ignavus*
- Parachites timbarae*
- Parachites ribesii*
- Parachites teretis*
- Harpacanthus epimelicola*
- Tasmanonops alpes*
- Oxyopes plumbeus*
- Loxosceles similis*
- Loxosceles rufescens*
- Loxosceles laeta*
- Loxosceles capense*
- Filistula insularis*
- Prithia bakari*
- Hypochilus sheari*
- Hypochilus borelli*
- Hypochilus bernardini*
- Cyrtopogon schmidti*
- Cyrtopogon huananensis*
- Brachypelma boehmei*
- Brachypelma albiceps*
- Lyroglyphus erotulus*
- Calisoga longitarsis*
- Hebestatus theveneti*
- Araus robbinsi*
- Haidynche versata*
- Acinopus sp.*
- Macrobile yuni*
- Austrochilidae sp.*
- Austrochilidae sp.*
- Austrochilidae jamaicensis*
- Austrochilidae subcapitulum*
- Thelechoris striatipes*
- Alysiid sp.*
- Alysiid gertschi*
- Alysiid sp.*
- Songhela sp.*
- Songhela hongkongensis*
- Liphistius erovan*
- Eromobates cf. palpitans*
- Mastigoproctus giganteus*
- Pseudogarypus banksi*
